# Supplementary material for: Effects of Irvingia gabonensis Extract on Metabolism, Antioxidants, Adipocytokines, Telomere Length, and Aerobic Capacity in Overweight/Obese Individuals
Source: MDPI journal article supplement (doi:10.3390/nu14214646), 2022-11-03
Supplement: s1 [file s1]

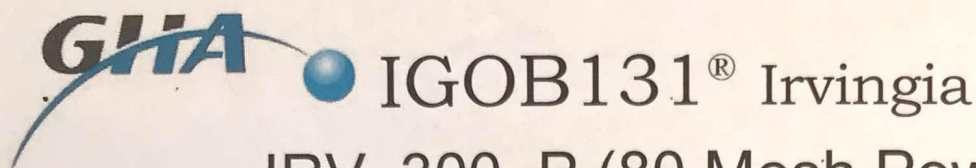

## IRV-300-P (80 Mesh Powder) Specification Sheet

### DESCRIPTION

Irvingia IRV-300 is a proprietary (US Patent 7,537,790) 10:1 aqueous extract of *Irvingia gabonensis* in a fine mesh powder for use as a dietary supplement in tableting, encapsulating and powder applications.

### MANUFACTURE DATE

### SPECIFICATIONS

|                                                |                                                                                                      |
|------------------------------------------------|------------------------------------------------------------------------------------------------------|
| Chemical Classification                        | Organic, Nutritive                                                                                   |
| Physical Classification                        | Powder, Non Fibrous                                                                                  |
| Genus, species                                 | <i>Irvingia gabonensis</i>                                                                           |
| Plant Part                                     | Seeds                                                                                                |
| Color                                          | Off-White                                                                                            |
| Odor                                           | Slight Nutty                                                                                         |
| Taste                                          | Nutty                                                                                                |
| Loss on Drying                                 | Less than 5%                                                                                         |
| Solubility (water)                             | Partly Soluble                                                                                       |
| pH (1g/100ml water)                            | 4.0 – 6.5                                                                                            |
| Active Ingredients                             |                                                                                                      |
| Albumins (proteins) Method No. SIC / Q.M / 242 | NLT 7%                                                                                               |
| Elagic Acid                                    | 0.96-1.44%                                                                                           |
| Solvents Used                                  | Water                                                                                                |
| Heavy Metals:                                  |                                                                                                      |
| Pb (ppm)                                       | Less than 0.5                                                                                        |
| As (ppm)                                       | Less than 2                                                                                          |
| Cd (ppm)                                       | Less than 0.2                                                                                        |
| Hg (ppm)                                       | Less than 1                                                                                          |
| Particle Size                                  | 98% thru 80 Mesh                                                                                     |
| Bulk Density (g/cc)                            | NLT 0.3                                                                                              |
| Microbiological Assays:                        |                                                                                                      |
| Total Plate Count (CFU/g)                      | Less than 5000                                                                                       |
| Yeast and Mold (CFU/g)                         | Less than 100                                                                                        |
| <i>E. Coli</i> (CFU/g)                         | Negative                                                                                             |
| <i>Salmonella</i> (CFU/g)                      | Negative                                                                                             |
| <i>Staph. aureus</i> (CFU/g)                   | Negative                                                                                             |
| Pesticide Assays:                              |                                                                                                      |
| Organochlorine                                 | Negative                                                                                             |
| Organophosphorous                              | Negative                                                                                             |
| Organonitrogen                                 | Negative                                                                                             |
| N-Methyl Carbamates                            | Negative                                                                                             |
| Aflatoxins                                     | Negative                                                                                             |
| Country of Origin                              | India                                                                                                |
| Country of Shipment                            | USA                                                                                                  |
| Shelf Life                                     | 5 years when stored in tightly closed dark containers in a cool dry location. Limit exposure to air. |
| Expiration Date                                |                                                                                                      |

*Sept 21, 2018*

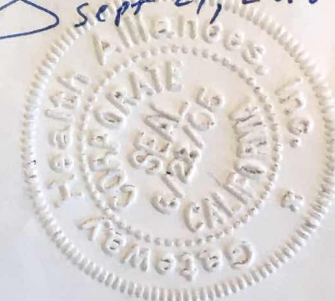

### PACKAGING

IRV-300-P is available in 25 kilogram quantities packaged in moisture, air and light-resistant containers.

Product Code IRV-300-P

Research Code IGOB131

Order Code IRV-300-P
