# Supplementary material for: Effects of Irvingia gabonensis Extract on Metabolism, Antioxidants, Adipocytokines, Telomere Length, and Aerobic Capacity in Overweight/Obese Individuals
Source: MDPI journal article supplement (doi:10.3390/nu14214646), 2022-11-03
Supplement: s1 [file s1]

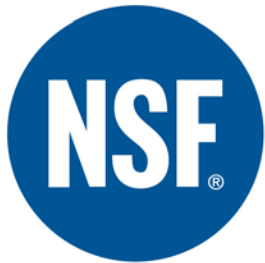

## NSF INTERNATIONAL

789 N. Dixboro Road, Ann Arbor, Michigan 48105 USA  
+1 800 673 6275

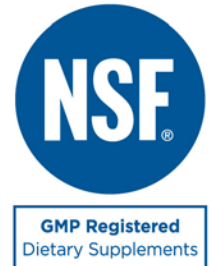

NSF International has assessed and confirmed compliance of

### **TCI Co., Ltd.**

Facility: No. 12 Shennong Road, Changzhi Township, Pingtung County 90846, TWN

### **to NSF GMP Registration Program Requirements of NSF/ANSI 173, Section 8**

which includes FSMA and cGMP (21 CFR 111), (21 CFR 117)

Print Date: December 26, 2018  
Certificate Number: C0164873-173GMPMF-1  
Initial Certification: 8/16/2013 1:01:38 PM  
Expiration Date: December 31, 2019

**Cheryl Luther**  
General Manager, Dietary Supplements  
and Beverage Quality
